# Supplementary material
Source: Research Square preprint supplement (doi:10.21203/rs.3.rs-9098903/v1)
Supplement: Supplementary file 1 [file b9ea992ceeb22be5ad019309.docx]

**Table S1.** Invertebrate species captured by traps in this study. Feeding guild: C = Carrion feeders, D = Detritivores, P = Predators, Om = Omnivorous, X = Xylophagous, Ot = Others.

| **Class** | **Species** | **Total (mean)** | | **Feeding guild** | **Literature** |
| --- | --- | --- | --- | --- | --- |
| **SiteA** | **SiteB** |
| Gastropoda | *Meghimatium bilineatum* | 0 (0) | 7 (1.4) | D | Jennings & Barkham (1979) |
|  | *Lehmannia valentiana* | 0 (0) | 5 (1) | D | Jennings & Barkham (1979) |
|  | *Euphaedusa tau* | 4 (0.1) | 0 (0) | D | Aoki (2010) |
|  | *Zaptychopsis buschi* | 1 (0.0) | 0 (0) | D | Aoki (2010) |
| Arachnida | Pholcidae sp. | 1 (0.0) | 1 (0.2) | P | Aoki (2010) |
|  | Agelenidae sp. | 5 (0.2) | 2 (0.4) | P | Aoki (2010) |
|  | Theridiidae sp. | 12 (0.4) | 2 (0.4) | P | Aoki (2010) |
|  | *Sinopoda forcipata* | 49 (1.7) | 0 (0) | P | Aoki (2010) |
|  | Thomisidae sp. | 6 (0.2) | 0 (0) | P | Aoki (2010) |
| Chilopoda | *Thereuopoda clunifera* | 51 (1.8) | 0 (0) | P | Aoki (2010) |
|  | *Scolopendra subspinipes mutilans* | 1 (0.0) | 0 (0) | P | Aoki (2010) |
| Crustacea | *Porcellio scaber* | 4 (0.1) | 14 (2.8) | D | Aoki (2010) |
|  | *Armadillidium vulgare* | 36 (1.2) | 71 (14.2) | D | Aoki (2010) |
| ; | *Spherillo* sp. | 1 (0.0) | 0 (0) | D | Aoki (2010) |
| Insecta | Machilidae sp. | 5 (0.2) | 0 (0) | D | Aoki (2010) |
|  | *Periplaneta fuliginosa* | 0 (0) | 1 (0.2) | Om | Aoki (2010) |
|  | *Periplaneta japonica* | 734 (25.3) | 73 (14.6) | Om | Aoki (2010) |
|  | *Ornebius kanetataki* | 5 (0.2) | 0 (0) | Ot |  |
|  | *Diestrammena japonica* | 101 (3.5) | 2 (0.4) | Om | Aoki (2010) |
|  | *Atachycines apicalis* | 2 (0.1) | 0 (0) | Om | Aoki (2010) |
|  | *Anisolabella marginalis* | 1 (0.0) | 0 (0) | Om | Aoki (2010) |
|  | Reduviidae sp. | 1 (0.0) | 0 (0) | P | Aoki (2010) |
|  | *Pselliophora bifascipennis* | 16 (0.6) | 1 (0.2) | Ot |  |
|  | *Spilomyia suzukii* | 1 (0.0) | 0 (0) | Ot |  |
|  | Fanniidae sp. (larvae) | 30 (1.0) | 31 (6.2) | C | Grzywacz et al. (2021) |
|  | *Lucillia ampullacea* (larvae) | 9 (0.3) | 17 (3.4) | C | Vanin et al. (2008) |
|  | *Calliphora vicina* (larvae) | 110 (3.8) | 94 (18.8) | C | Donovan at al. (2006) |
|  | *Monopis longella* | 0 (0) | 1 (0.2) | Ot |  |
|  | *Amphipyra monolitha* | 3 (0.1) | 14 (2.8) | Ot |  |
|  | *Vespa dybowskii* | 1 (0.0) | 0 (0) | P | Rosario et al. (2025) |
|  | Histerinae sp. | 1 (0.0) | 0 (0) | P | Aoki (2010) |
|  | Cholerinae sp. | 1 (0.0) | 0 (0) | Ot |  |
|  | *Nicrophorus quadripunctatus* | 15 (0.5) | 0 (0) | C | Aoki (2010) |
|  | Staphylinidae sp. | 1 (0.0) | 0 (0) | Ot |  |
|  | *Rhomborhina polita* | 1 (0.0) | 0 (0) | Ot |  |
|  | *Glischrochilus japonicus* | 1 (0.0) | 0 (0) | Ot |  |
|  | *Pediacus japonicus* | 5 (0.2) | 0 (0) | Ot |  |
|  | *Mycetophagus hillerianus* | 14 (0.5) | 0 (0) | Ot |  |
|  | *Derosphaerus subviolaceus* | 16 (0.6) | 0 (0) | X | Hayashi (1999) |
|  | *Allecula fuliginosa* | 23 (0.8) | 0 (0) | X | Hayashi (2000) |
|  | *Plesiophthalmus spectabilis* | 7 (0.2) | 6 (1.2) | X | Aoki (2010); Akita & Masumoto (2016) |
